# Supplementary material for: Influence of Addition of Dried Maitake and Enoki Mushrooms on Antioxidant, Potentially Anti-Inflammatory, and Anti-Cancer Properties of Enriched Pasta
Source: MDPI journal article supplement (doi:10.3390/app13148183), 2023-07-14
Supplement: s1 [file s1]

**Table S1** Parameters of all the molecules monitored with the MRM method

| Compound                    | Precursor ion<br>Q1 (m/z) | Product ion Q2 (m/z) | CE (V) | Retention time<br>(min) |
|-----------------------------|---------------------------|----------------------|--------|-------------------------|
| Gallic acid 1               | 169                       | 124.9                | −20    | 1.89                    |
| Gallic acid 2               | 169                       | 78.9                 | −30    | 1.89                    |
| 3,4-Dihydroxybenzoic acid 1 | 153                       | 108.9                | −20    | 3                       |
| 3,4-Dihydroxybenzoic acid 2 | 153                       | 65                   | −26    | 3                       |
| Chlorogenic acid 1          | 352.9                     | 190.8                | −26    | 3.45                    |
| Chlorogenic acid 2          | 352.9                     | 84.9                 | −26    | 3.45                    |
| Caffeic acid 1              | 179                       | 135                  | −22    | 3.75                    |
| Caffeic acid 2              | 179                       | 107                  | −32    | 3.75                    |
| Syringic acid 1             | 197                       | 181.9                | −18    | 3.8                     |
| Syringic acid 2             | 197                       | 122.9                | −30    | 3.8                     |
| Daidzin 1                   | 415.1                     | 251.9                | −38    | 3.96                    |
| Daidzin 2                   | 415.1                     | 222.8                | −38    | 3.96                    |
| Rutin 1                     | 609                       | 300.3                | −46    | 4.01                    |
| Rutin 2                     | 609                       | 270.9                | −46    | 4.01                    |
| Ellagic acid 1              | 301                       | 284                  | −40    | 4.27                    |
| Ellagic acid 2              | 301                       | 229                  | −38    | 4.27                    |
| p-Coumaric acid 1           | 163                       | 119                  | −20    | 4.33                    |
| p-Coumaric acid 2           | 163                       | 92.9                 | −42    | 4.33                    |
| Salicylic acid 1            | 137                       | 93                   | −16    | 4.46                    |
| Salicylic acid 2            | 137                       | 75                   | −40    | 4.46                    |
| Vanillin 1                  | 150.9                     | 136.1                | −18    | 4.65                    |
| Vanillin 2                  | 150.9                     | 91.9                 | −26    | 4.65                    |
| Cynarin 1                   | 515                       | 353                  | −28    | 4.68                    |

|                        |       |       |     |      |
|------------------------|-------|-------|-----|------|
| Cynarin 2              | 515   | 191   | -42 | 4.68 |
| m-Coumaric acid 1      | 163   | 119   | -20 | 4.72 |
| m-Coumaric acid 2      | 163   | 92.9  | -42 | 4.72 |
| Ferulic acid 2         | 193   | 177.9 | -18 | 4.74 |
| Ferulic acid 1         | 193   | 134   | -22 | 4.74 |
| Sinapic acid 1         | 223.1 | 164   | -22 | 4.78 |
| Sinapic acid 2         | 223.1 | 148.9 | -28 | 4.78 |
| Rosmarinic acid 1      | 358.9 | 160.9 | -22 | 4.8  |
| Rosmarinic acid 2      | 358.9 | 132.6 | -40 | 4.8  |
| Naringin               | 579   | 271   | -32 | 5.03 |
| Quercetin 1            | 301   | 121   | -34 | 7.08 |
| Quercetin 2            | 301.1 | 150.9 | -30 | 7.08 |
| trans-cinnamic-d7 acid | 153.9 | 110   | -16 | 7.4  |
| trans-cinnamic acid 1  | 146.9 | 77    | -28 | 7.53 |
| trans-cinnamic acid 2  | 146.9 | 103   | -14 | 7.53 |
| Apigenin 1             | 269.9 | 116.9 | -42 | 8.33 |
| Apigenin 2             | 269.9 | 150.9 | -34 | 8.33 |
| Genistein 1            | 269   | 133   | -30 | 8.42 |
| Genistein 2            | 269   | 159   | -40 | 8.42 |
| Naringenin 1           | 271   | 150.9 | -24 | 8.51 |
| Naringenin 2           | 271   | 118.9 | -34 | 8.51 |

**Table S2.** Phenolic compounds profile in dried mushrooms (Enoki and Maitake) identified using the LC-MS/MS technique

| Polyphenolic Compound       | Enoki                    | Maitake                   |
|-----------------------------|--------------------------|---------------------------|
| [ng *10 <sup>3</sup> /g DW] |                          |                           |
| 3,4-Dihydroxybenzoic acid   | 1.66 ± 0.12 <sup>a</sup> | 10.15 ± 0.39 <sup>b</sup> |
| Caffeic acid                | <0.5                     | 10.74 ± 0.81              |
| Syringic acid               | <0.5                     | 12.19 ± 0.45              |
| Daidzin                     | n.d                      | n.d                       |
| Rutin                       | <0.5                     | <0.5                      |
| Ellagic acid                | <0.5                     | 3.57 ± 0.52               |
| <i>p</i> -Coumaric acid     | 0.64 ± 0.06 <sup>a</sup> | 15.67 ± 0.64 <sup>b</sup> |
| Salicylic acid              | <0.5                     | <0.5                      |
| Vanillin                    | <0.5                     | 6.97 ± 0.74               |
| Ferulic acid                | 0.75 ± 0.20 <sup>a</sup> | 36.58 ± 3.79 <sup>b</sup> |
| Sinapic acid                | <0.5                     | 0.52 ± 0.08               |
| Rosmarinic acid             | n.d                      | n.d                       |
| <i>t</i> -Cinnamic acid     | <0.5                     | n.d                       |
| Genistein                   | <0.5                     | <0.5                      |
| Naringenin                  | <0.5                     | 0.57 ± 0.06               |

<0.5 [μg/g DW] below the limit of determination of the lowest calibration point; n.d.—not detected. Samples with different superscripts within a row are significantly different at  $p \leq 0.05$ .
